# Supplementary material for: Assessing the Potential of Algae Extracts for Extending the Shelf Life of Rainbow Trout (Oncorhynchus mykiss) Fillets
Source: MDPI journal article supplement (doi:10.3390/foods10050910), 2021-04-21
Supplement: s1 [file s1]

**Table S1.** Changes in psychrophilic bacterial counts (PBC, log cfu g<sup>-1</sup>) in rainbow trout fillets treated with distilled water (C); ascorbic acid (ASC) and aqueous extracts of *Crassiphycus corneus* (Cc), *Ulva ohnoi* (Uo), *Arthrospira platensis* (Ap) and *Haematococcus pluvialis* (Hp) during a 12-day cold storage (4 °C) period. Values are given as mean ± standard deviation (n = 4 fillets).

| dpm | C                        | ASC                      | Cc                        | Uo                       | Ap                       | Hp                       | p      |
|-----|--------------------------|--------------------------|---------------------------|--------------------------|--------------------------|--------------------------|--------|
| 1   | 2.2 ± 0.1 <sup>A,d</sup> | 1.8 ± 0.1 <sup>A,c</sup> | 1.9 ± 0.1 <sup>A,c</sup>  | 1.8 ± 0.1 <sup>A,c</sup> | 1.3 ± 0.1 <sup>A,b</sup> | 0.9 ± 0.1 <sup>A,a</sup> | <0.001 |
| 4   | 4.7 ± 0.1 <sup>B,d</sup> | 3.0 ± 0.1 <sup>B,c</sup> | 2.0 ± 0.1 <sup>A,b</sup>  | 1.6 ± 0.1 <sup>A,a</sup> | 2.0 ± 0.1 <sup>B,b</sup> | 1.7 ± 0.1 <sup>B,a</sup> | <0.001 |
| 6   | 5.5 ± 0.2 <sup>C,d</sup> | 4.2 ± 0.1 <sup>C,c</sup> | 4.0 ± 0.1 <sup>B,bc</sup> | 3.1 ± 0.1 <sup>B,a</sup> | 3.9 ± 0.1 <sup>C,b</sup> | 3.9 ± 0.1 <sup>C,b</sup> | 0.001  |
| 8   | 5.7 ± 0.1 <sup>C,c</sup> | 4.8 ± 0.1 <sup>D,b</sup> | 4.8 ± 0.1 <sup>C,b</sup>  | 4.9 ± 0.1 <sup>C,b</sup> | 4.9 ± 0.1 <sup>D,b</sup> | 5.0 ± 0.3 <sup>D,a</sup> | <0.001 |
| 12  | 6.5 ± 0.1 <sup>D,c</sup> | 5.4 ± 0.1 <sup>E,a</sup> | 4.7 ± 0.2 <sup>C,a</sup>  | 5.0 ± 0.1 <sup>C,a</sup> | 4.7 ± 0.1 <sup>D,a</sup> | 4.8 ± 0.1 <sup>D,a</sup> | 0.001  |
| p   | <0.001                   | <0.001                   | <0.001                    | <0.001                   | <0.001                   | <0.001                   |        |

Superscript uppercase letters indicate differences attributable to storage time within each treatment. Superscript lower-case letters indicate differences attributable to treatments within each storage time ( $p < 0.05$ ). dpm: days postmortem.

**Table S2.** Changes in lipid oxidation (estimated as mg MDA kg<sup>-1</sup> content) in rainbow trout fillets treated with distilled water (C); ascorbic acid (ASC) and aqueous extracts of *Crassiphycus corneus* (Cc), *Ulva ohnoi* (Uo), *Arthrospira platensis* (Ap) and *Haematococcus pluvialis* (Hp) during a 12-day cold storage (4 °C) period. Values are given as mean ± standard deviation (n = 4 fillets).

| dpm | C                        | ASC                      | Cc                        | Uo                        | Ap                        | Hp                       | p      |
|-----|--------------------------|--------------------------|---------------------------|---------------------------|---------------------------|--------------------------|--------|
| 1   | 1.6 ± 0.1 <sup>A,d</sup> | 1.4 ± 0.2 <sup>A,c</sup> | 1.0 ± 0.1 <sup>A,b</sup>  | 0.6 ± 0.2 <sup>A,a</sup>  | 1.2 ± 0.1 <sup>A,bc</sup> | 1.4 ± 0.1 <sup>A,c</sup> | 0.023  |
| 4   | 3.9 ± 0.4 <sup>B,d</sup> | 2.6 ± 0.1 <sup>B,c</sup> | 2.0 ± 0.2 <sup>B,b</sup>  | 1.8 ± 0.4 <sup>B,ab</sup> | 2.1 ± 0.1 <sup>B,b</sup>  | 1.7 ± 0.1 <sup>A,a</sup> | <0.001 |
| 6   | 5.5 ± 0.6 <sup>C,e</sup> | 3.9 ± 0.1 <sup>C,d</sup> | 2.6 ± 0.3 <sup>BC,a</sup> | 3.0 ± 0.1 <sup>C,b</sup>  | 3.4 ± 0.1 <sup>C,c</sup>  | 3.8 ± 0.2 <sup>B,d</sup> | <0.001 |
| 8   | 7.1 ± 0.4 <sup>D,c</sup> | 4.9 ± 0.4 <sup>D,b</sup> | 3.2 ± 0.3 <sup>B,a</sup>  | 4.6 ± 0.3 <sup>D,b</sup>  | 3.7 ± 0.4 <sup>CD,a</sup> | 3.4 ± 0.4 <sup>B,a</sup> | 0.001  |
| 12  | 8.1 ± 0.3 <sup>D,d</sup> | 6.4 ± 0.4 <sup>E,c</sup> | 3.9 ± 0.2 <sup>C,a</sup>  | 4.0 ± 0.3 <sup>D,a</sup>  | 3.9 ± 0.1 <sup>D,a</sup>  | 4.9 ± 0.1 <sup>C,b</sup> | <0.001 |
| p   | <0.001                   | <0.001                   | 0.001                     | <0.001                    | <0.001                    | <0.001                   |        |

Superscript uppercase letters indicate differences attributable to storage time within each treatment. Superscript lower-case letters indicate differences attributable to treatments within each storage time ( $p < 0.05$ ). dpm: days postmortem.

**Table S3.** Changes in pH and water holding capacity (WHC) in rainbow trout fillets treated with distilled water (C); ascorbic acid (ASC) and aqueous extracts of *Crassiphycus corneus* (Cc), *Ulva ohnoi* (Uo), *Arthrospira platensis* (Ap) and *Haematococcus pluvialis* (Hp) during a 12-day cold storage (4 °C) period. Values are given as mean  $\pm$  standard deviation (n = 4 fillets).

|     | dpm | C                               | ASC                              | Cc                              | Uo                               | Ap                              | Hp                               | p      |
|-----|-----|---------------------------------|----------------------------------|---------------------------------|----------------------------------|---------------------------------|----------------------------------|--------|
| pH  | 1   | 6.67 $\pm$ 0.02 <sup>A,a</sup>  | 6.60 $\pm$ 0.02 <sup>A, ab</sup> | 6.58 $\pm$ 0.03 <sup>A c</sup>  | 6.63 $\pm$ 0.02 <sup>A, bd</sup> | 6.57 $\pm$ 0.03 <sup>A, c</sup> | 6.56 $\pm$ 0.02 <sup>A, c</sup>  | 0.042  |
|     | 4   | 6.68 $\pm$ 0.04 <sup>A</sup>    | 6.65 $\pm$ 0.02 <sup>B</sup>     | 6.61 $\pm$ 0.02 <sup>A</sup>    | 6.65 $\pm$ 0.03 <sup>A</sup>     | 6.56 $\pm$ 0.02 <sup>A</sup>    | 6.58 $\pm$ 0.02 <sup>A</sup>     | 0.600  |
|     | 6   | 6.70 $\pm$ 0.04 <sup>A</sup>    | 6.63 $\pm$ 0.02 <sup>B</sup>     | 6.59 $\pm$ 0.02 <sup>A</sup>    | 6.65 $\pm$ 0.03 <sup>A</sup>     | 6.59 $\pm$ 0.03 <sup>A</sup>    | 6.59 $\pm$ 0.04 <sup>A</sup>     | 0.297  |
|     | 8   | 6.72 $\pm$ 0.02 <sup>A, a</sup> | 6.68 $\pm$ 0.03 <sup>C, b</sup>  | 6.65 $\pm$ 0.03 <sup>B, b</sup> | 6.68 $\pm$ 0.02 <sup>AB, b</sup> | 6.61 $\pm$ 0.03 <sup>A, c</sup> | 6.66 $\pm$ 0.02 <sup>B, b</sup>  | 0.001  |
|     | 12  | 6.79 $\pm$ 0.02 <sup>B, a</sup> | 6.76 $\pm$ 0.04 <sup>D, a</sup>  | 6.76 $\pm$ 0.05 <sup>C, a</sup> | 6.70 $\pm$ 0.03 <sup>B, ab</sup> | 6.66 $\pm$ 0.01 <sup>B, b</sup> | 6.72 $\pm$ 0.02 <sup>C, ab</sup> | 0.024  |
|     | p   | 0.045                           | <0.001                           | <0.001                          | 0.002                            | 0.045                           | <0.001                           |        |
| WHC | 1   | 71.0 $\pm$ 2.6 <sup>C,a</sup>   | 70.7 $\pm$ 2.1 <sup>C,a</sup>    | 70.8 $\pm$ 3.0 <sup>B,a</sup>   | 70.9 $\pm$ 1.3 <sup>B,a</sup>    | 71.2 $\pm$ 0.9 <sup>B,a</sup>   | 76.4 $\pm$ 0.9 <sup>B,b</sup>    | <0.001 |
|     | 4   | 70.6 $\pm$ 1.9 <sup>C,a</sup>   | 68.1 $\pm$ 2.3 <sup>B,a</sup>    | 70.1 $\pm$ 2.4 <sup>B,a</sup>   | 68.3 $\pm$ 1.5 <sup>AB,a</sup>   | 70.7 $\pm$ 1.4 <sup>B,a</sup>   | 76.5 $\pm$ 0.9 <sup>B,b</sup>    | <0.001 |
|     | 6   | 68.6 $\pm$ 1.8 <sup>C</sup>     | 68.5 $\pm$ 2.3 <sup>B</sup>      | 68.2 $\pm$ 1.4 <sup>AB</sup>    | 69.2 $\pm$ 1.3 <sup>AB</sup>     | 69.3 $\pm$ 0.8 <sup>B</sup>     | 71.4 $\pm$ 2.3 <sup>A</sup>      | 0.183  |
|     | 8   | 66.6 $\pm$ 1.3 <sup>B,a</sup>   | 67.4 $\pm$ 1.6 <sup>B,a</sup>    | 67.5 $\pm$ 1.6 <sup>AB,a</sup>  | 68.3 $\pm$ 0.7 <sup>AB,a</sup>   | 68.1 $\pm$ 0.8 <sup>A,a</sup>   | 70.5 $\pm$ 0.6 <sup>A,a</sup>    | 0.004  |
|     | 12  | 63.7 $\pm$ 1.9 <sup>A,a</sup>   | 64.9 $\pm$ 1.7 <sup>A,ab</sup>   | 66.2 $\pm$ 1.4 <sup>A,b</sup>   | 66.5 $\pm$ 1.4 <sup>A,b</sup>    | 66.3 $\pm$ 0.9 <sup>A,b</sup>   | 69.6 $\pm$ 1.1 <sup>A,c</sup>    | <0.001 |
|     | p   | <0.001                          | 0.002                            | <0.001                          | <0.001                           | <0.001                          | 0.002                            |        |

Superscript uppercase letters indicate differences attributable to storage time within each treatment. Superscript lower-case letters indicate differences attributable to treatments within each storage time ( $p < 0.05$ ). dpm: days postmortem.
